# Supplementary material for: Sublingual bivalent vaccination with PspA-C-CPE and Alcaligenes lipid A induces protective immunity against both Streptococcus pneumoniae and Clostridium perfringens
Source: Research Square preprint supplement (doi:10.21203/rs.3.rs-10001561/v1), 2026-07-01
Supplement: Supplementary file 1 [file 95aad17367c14f8689a46c38.docx]

**Supplementary Figure 1.** Sublingual administration of PspA-C-CPE with *Alcaligenes* lipid A enhances antigen-specific antibody production. Mice were sublingually immunized with PBS, PspA-C-CPE only, or PspA-C-CPE combined with *Alcaligenes* lipid A three times at 1-week intervals. At 1 week after the final immunization, bronchoalveolar lavage fluid (BALF) and serum were collected (n = 8 per group). PspA-specific IgG in BALF (A) and PspA-specific IgA in serum (B) were measured by ELISA. Data are representative of two independent experiments and are presented as the mean ± SD.

**Supplementary Figure 2.** Sublingual administration of PspA-C-CPE with *Alcaligenes* lipid A inhibits CPE-induced hyperkalemia by inducing C-CPE-specific neutralizing antibodies. Mice were sublingually immunized with PBS, PspA-C-CPE alone, or PspA-C-CPE combined with *Alcaligenes* lipid A three times at 1-week intervals. At 1 week after the final immunization, mice were intravenously injected with CPE (100 µg/kg body weight) via the tail vein (n = 8 per group). Representative images of mice were captured 30 minutes after CPE challenge.

**Supplementary Figure 3.** Sublingual administration of PspA-C-CPE with *Alcaligenes* lipid A protects against lethal *S. pneumoniae* respiratory infection. Mice were sublingually immunized with PBS, PspA-C-CPE alone, or PspA-C-CPE combined with *Alcaligenes* lipid A three times at 1-week intervals. At 1 week after the final immunization, mice were challenged with a lethal dose of *S. pneumoniae* via the respiratory tract. Body weight changes were monitored for up to 14 days after infection. Note, mice that lost 20% or more of their preinfection body weight were killed due to reaching a humane endpoint. Data are expressed as a percentage of the initial body weight prior to infection. Data are representative of two independent experiments.
